# Supplementary material
Source: PubMed Central journal article supplement (PMC7965212)
Supplement: 3608_table.pdf [file 3608_table.pdf]

**On-line Table: Functional network connectivity of pairs of independent components (ICs) for all of the resting state networks in frontal lobe epilepsy (FLE) patients and controls**

|        | Controls (pairs of ICs) | FLE Patients (pairs of ICs) |
|--------|-------------------------|-----------------------------|
| FR-DMN | 40-36                   | 46-36                       |
|        | 40-50                   | 46-50                       |
|        | 46-75                   |                             |
| FR-AN  | 46-50                   |                             |
|        | 40-33                   | 40-33                       |
|        | 40-65                   | 46-65                       |
|        | 40-59                   | 28-33                       |
|        | 40-48                   |                             |
|        | 46-33                   |                             |
|        | 46-65                   |                             |
| FR-SM  | 28-33                   |                             |
|        | 28-59                   |                             |
|        | 40-60                   | 28-43                       |
|        | 40-42                   | 46-8                        |
| FR-VS  | 46-12                   | 46-14                       |
|        | 46-8                    |                             |
|        | 46-60                   |                             |
|        | 28-20                   | 40-56                       |
| FR-AD  | 40-63                   | 46-56                       |
|        | 40-56                   |                             |
|        | 46-52                   |                             |
| DMN-AN | 46-62                   | 46-62                       |
|        |                         | 40-62                       |
|        | 36-48                   | 4-35                        |
|        | 50-65                   | 4-65                        |
|        | 50-59                   | 50-65                       |
| DMN-SM | 75-65                   | 50-59                       |
|        |                         | 75-35                       |
|        |                         | 75-65                       |
|        | 4-42                    | 4-42                        |
|        | 36-60                   | 36-8                        |
|        | 36-42                   | 50-43                       |
|        | 50-60                   | 75-43                       |
|        | 75-43                   | 75-42                       |
|        | 75-42                   |                             |
|        | 75-14                   |                             |
| 75-12  |                         |                             |
| DMN-VS | 36-56                   | 50-41                       |
|        | 36-63                   | 75-63                       |
|        | 50-41                   | 75-56                       |
|        | 75-63                   | 75-52                       |
|        | 75-56                   | 75-47                       |
|        | 75-47                   | 75-41                       |
|        | 75-41                   |                             |
| DMN-AD | -                       | 50-62                       |
|        |                         | 75-62                       |
| AN-SM  | 33-60                   | 35-42                       |
|        | 35-12                   | 48-14                       |
|        | 35-42                   | 48-12                       |
|        | 48-42                   | 48-60                       |
|        | 48-14                   | 59-43                       |
|        | 48-12                   | 59-12                       |
|        | 48-60                   | 59-8                        |
|        | 59-12                   |                             |
|        | 59-8                    |                             |
|        | 59-60                   |                             |
|        | 65-43                   |                             |

Continued on next column

**Continued**

|       | Controls (pairs of ICs) | FLE Patients (pairs of ICs) |
|-------|-------------------------|-----------------------------|
| AN-VS | 33-20                   | 35-20                       |
|       | 33-56                   | 35-41                       |
|       | 35-47                   | 35-47                       |
|       | 35-52                   | 35-52                       |
|       | 35-56                   | 48-20                       |
|       | 48-20                   | 48-52                       |
|       | 59-56                   | 59-47                       |
|       | 59-52                   | 59-63                       |
|       | 65-52                   | 65-20                       |
|       | 65-56                   |                             |
| AN-AD | 65-63                   |                             |
|       | 65-62                   | 65-62                       |
| SM-VS | 33-62                   |                             |
|       | 47-8                    | 20-14                       |
|       | 52-43                   | 41-14                       |
|       | 52-12                   | 41-43                       |
|       | 52-8                    | 47-43                       |
|       | 56-14                   | 47-12                       |
|       | 63-8                    | 52-12                       |
|       | 63-12                   | 56-14                       |
|       | 63-43                   | 63-8                        |
|       |                         | 63-12                       |
| SM-AD |                         | 63-14                       |
|       |                         | 63-43                       |
|       | 60-62                   | 43-62                       |
|       | 43-62                   | 14-62                       |
|       | 14-62                   | 12-62                       |
| VS-AD | 12-62                   | 8-61                        |
|       | 8-62                    |                             |
|       | 52-62                   | 47-62                       |
|       |                         | 41-62                       |
|       |                         | 63-62                       |

**Note:**—FR indicates ????, DMN, ???, AD, ????, AN, ????, SM, ????, VS, ????
